# Supplementary material for: High Tuberculosis Density Incidence Rate in Matched Unrelated Allogeneic Stem Cell Transplantation Recipients in the State of São Paulo, Brazil
Source: PubMed Central journal article supplement — Mediterr J Hematol Infect Dis. 2023 Jul 1;15(1):e2023037. doi: 10.4084/MJHID.2023.037 (PMC10332347; doi:10.4084/mjhid.2023.037), 2023-07-01
Supplement: MJHID-15-1-e2023037_supp.pdf [file MJHID-15-1-e2023037_supp.pdf]

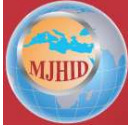

**Supplementary files**

**High Tuberculosis Density Incidence Rate in Matched Unrelated Allogeneic Stem Cell Transplantation Recipients in the State of São Paulo, Brazil**

Marcelo Nóbrega Litvoc<sup>1</sup>, Fabio Eudes Leal<sup>2</sup>, Diogo Boldim Ferreira<sup>3</sup>, Max Igor Banks Ferreira Lopes<sup>1</sup>, Ligia Capuani<sup>4</sup>, Vanderson Geraldo Rocha<sup>5</sup> and Silvia Figueiredo Costa<sup>1,4</sup>.

<sup>1</sup> Hospital das Clínicas, Faculdade de Medicina da Universidade de São Paulo (FMUSP), São Paulo, SP, Brazil.

<sup>2</sup> Instituto Nacional de Câncer, Rio de Janeiro, Brazil.

<sup>3</sup> Hospital São Paulo, Escola Paulista de Medicina da Universidade Federal de São Paulo (UNIFESP), São Paulo, SP, Brazil.

<sup>4</sup> Departamento de Doenças Infecciosas e Parasitárias, Laboratório de Investigação Médica em Protozoologia, Bacteriologia e Resistência Antimicrobiana (LIM 49), Faculdade de Medicina da Universidade de São Paulo (FMUSP), São Paulo, SP, Brazil.

<sup>5</sup> Haematology Department, NHS BT, Oxford University, Oxford, UK.

**Online Supplement**

**Supplementary material**

Clinical characteristics of tuberculosis in allo-HSCT in the state of São Paulo, Brazil.

| Cases                         | 1                          | 2                           | 3                           | 4                           | 5                           |
|-------------------------------|----------------------------|-----------------------------|-----------------------------|-----------------------------|-----------------------------|
| Name                          | DCQL                       | WZHB                        | JAS                         | RMF                         | FVF                         |
| Sex                           | F                          | M                           | F                           | M                           | M                           |
| Age at HSCT                   | 33                         | 27                          | 14                          | 29                          | 22                          |
| Date of HSCT                  | Aug 8 <sup>th</sup> , 2010 | Oct 10 <sup>th</sup> , 2010 | Jul 7 <sup>th</sup> , 2012  | Jul 19 <sup>th</sup> , 2013 | Aug 8 <sup>th</sup> , 2013  |
| Number of HSCT                | 2                          | 1                           | 1                           | 1                           | 1                           |
| Disease                       | CML                        | HD                          | AML                         | NHL                         | ALL                         |
| Hospital                      | (A)                        | (B)                         | (C)                         | (D)                         | (E)                         |
| Tuberculosis Diagnosis Date   | Dec 1 <sup>st</sup> , 2010 | Sep 13 <sup>th</sup> , 2013 | Mar 19 <sup>th</sup> , 2014 | Sep 20 <sup>th</sup> , 2013 | Oct 10 <sup>th</sup> , 2013 |
| Time until TB diagnosis(days) | 110                        | 1048                        | 599                         | 63                          | 61                          |
| Clinical presentation         | Pulmonary                  | Neuro                       | Pulmonary                   | Pulmonary                   | Pulmonary                   |
| Treatment                     | RHZE                       | RHZE                        | RHZE                        | RHZE                        | RHZE                        |
| Tuberculosis outcome          | Cure                       | Abandonment                 | Cure                        | Cure                        | Cure                        |

CML: Chronic Lymphocytic Leukemia, HD: Hodgkin Disease, AML: Acute Myeloid Leukemia, NHL: Non-Hodgkin Lymphoma, ALL: Acute Lymphoblastic Leukemia, RHZE: Rifampicin, Isoniazid, Pyrazinamide and Ethambutol.
